# Supplementary material for: Guest encapsulation and coronene–C60 exchange in supramolecular zinc porphyrin tweezers, grids and prisms
Source: Royal Society of Chemistry journal article supplement (doi:10.1039/c3ob27481k), 2013-01-01
Supplement: c3ob27481k.pdf [file c3ob27481k.pdf]

# Electronic Supporting Information for

## Guest Encapsulation and Coronene-C<sub>60</sub> Exchange in Supramolecular Zinc Porphyrin Tweezers, Grids and Prisms

**Soumen K. Samanta, Michael Schmittel\***

*Center of Micro and Nanochemistry and Engineering, Universität  
Siegen, Adolf-Reichwein-Strasse, 57068 Siegen, Germany. Fax: (+49) 271-740-3270; E-mail:  
schmittel@chemie.uni-siegen.de*

### Contents

|                                  |    |
|----------------------------------|----|
| NMR Spectra .....                | 2  |
| ESI-MS .....                     | 9  |
| Absorption Spectral Data.....    | 13 |
| Energy Minimised Structures..... | 16 |
| DOSY NMR .....                   | 17 |

## NMR Spectra

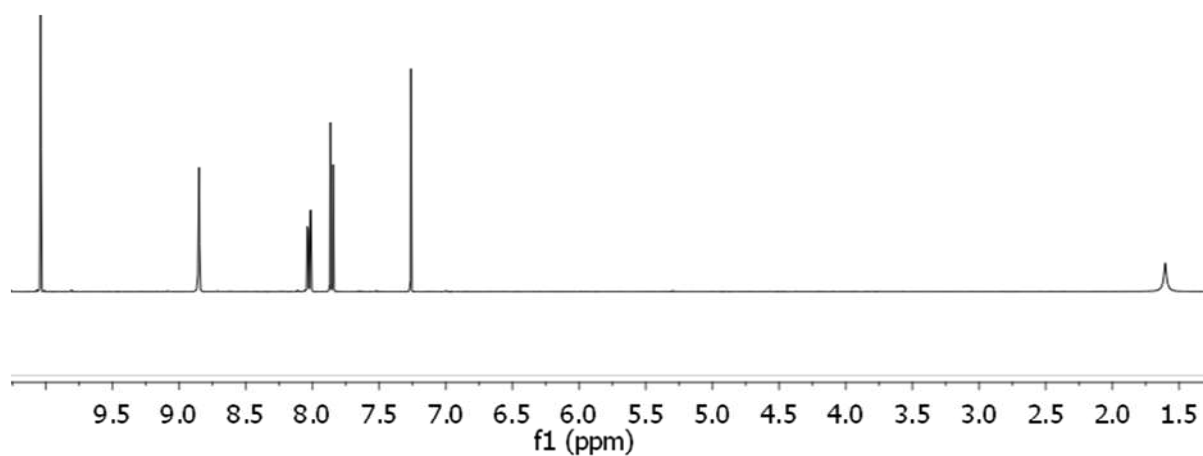

**Figure S1.**  $^1\text{H}$  NMR of compound **4** ( $\text{CDCl}_3$ , 400 MHz, 298 K).

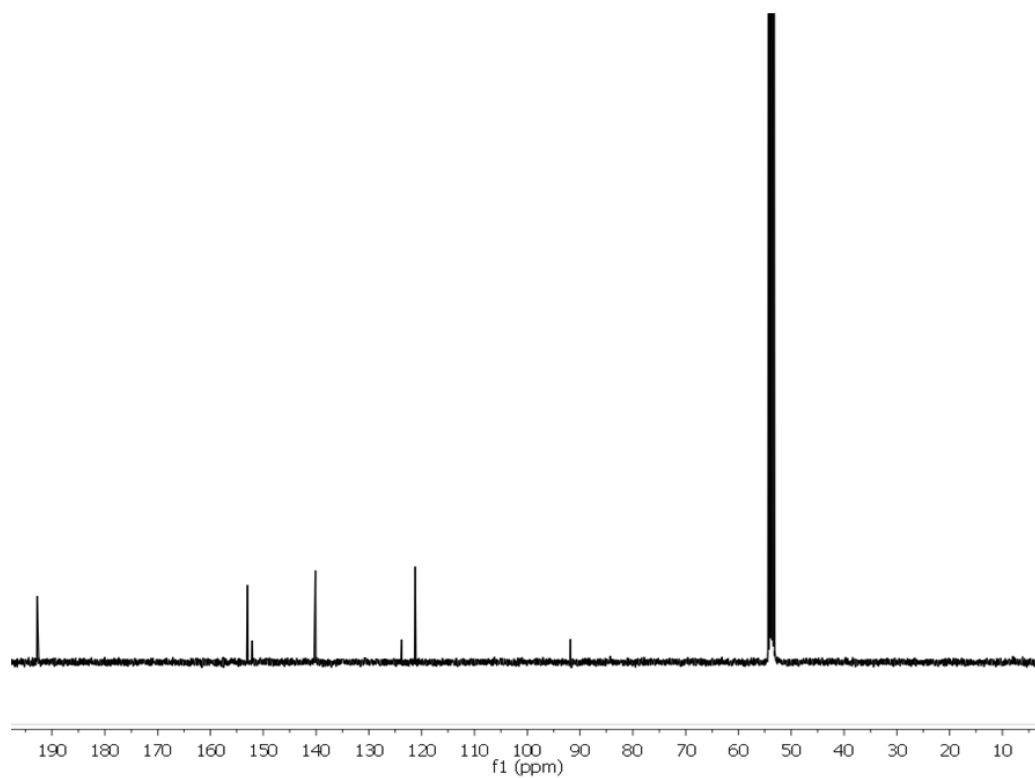

**Figure S2.**  $^{13}\text{C}$  NMR of compound **4** ( $\text{CD}_2\text{Cl}_2$ , 100 MHz, 298 K).

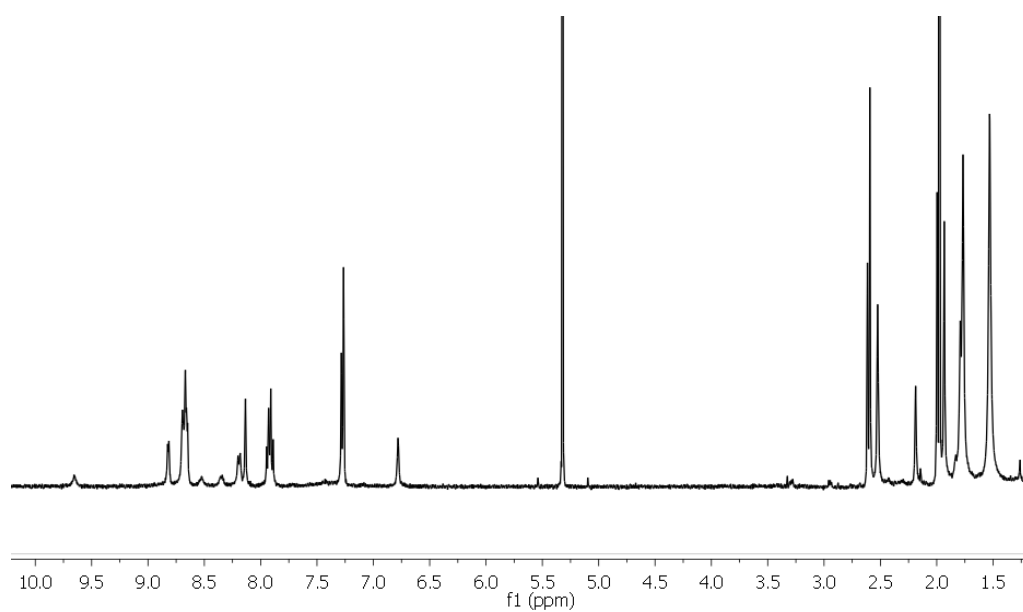

**Figure S3.**  $^1\text{H}$  NMR of **T** ( $\text{CD}_2\text{Cl}_2$ , 400 MHz, 298 K).

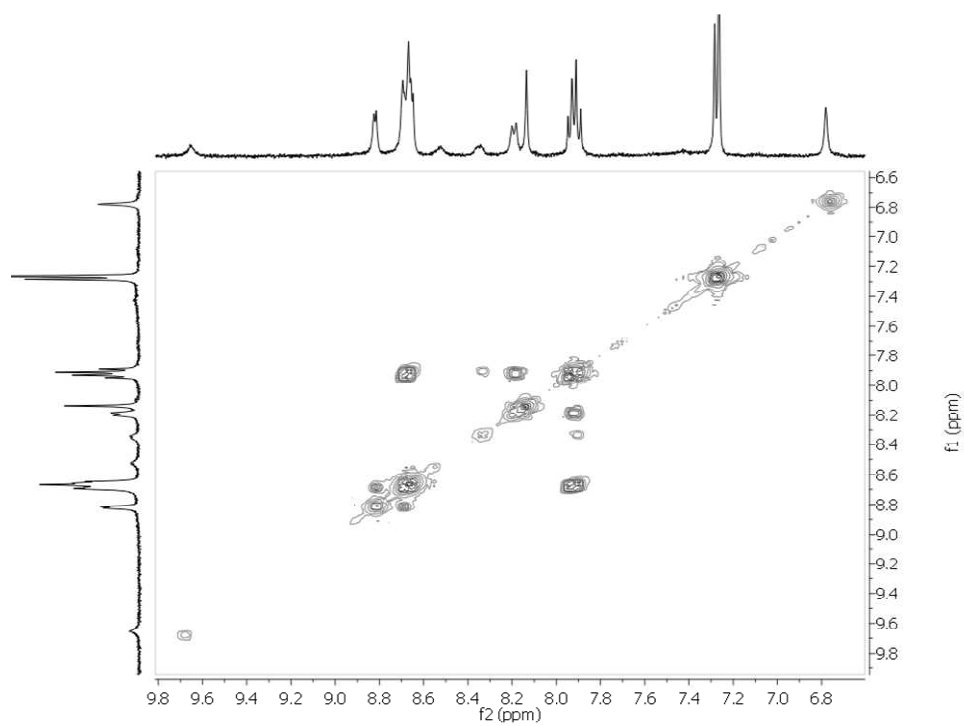

**Figure S4.**  $^1\text{H}$ - $^1\text{H}$  COSY of **T** ( $\text{CD}_2\text{Cl}_2$ , 400 MHz, 298 K).

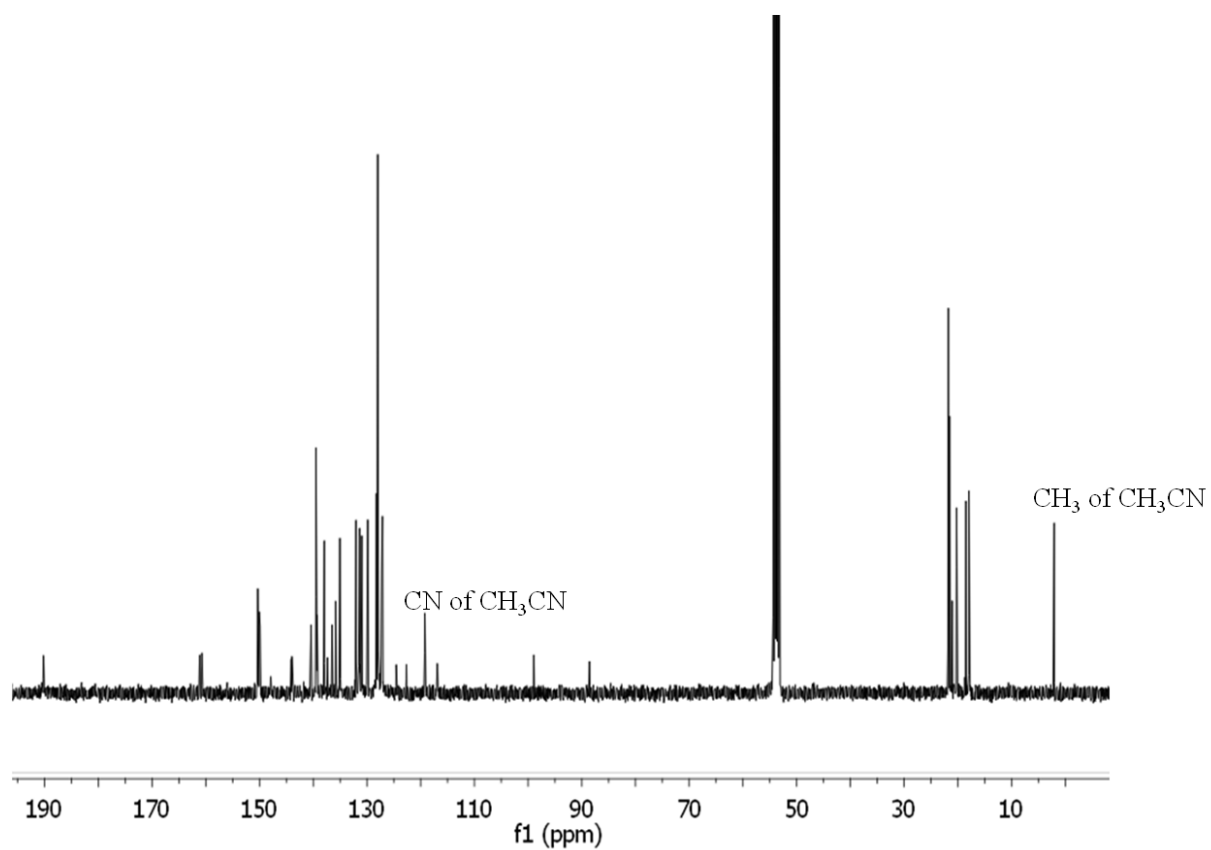

**Figure S5.**  $^{13}\text{C}$  NMR of **T** ( $\text{CD}_2\text{Cl}_2$ , 100 MHz, 298 K).

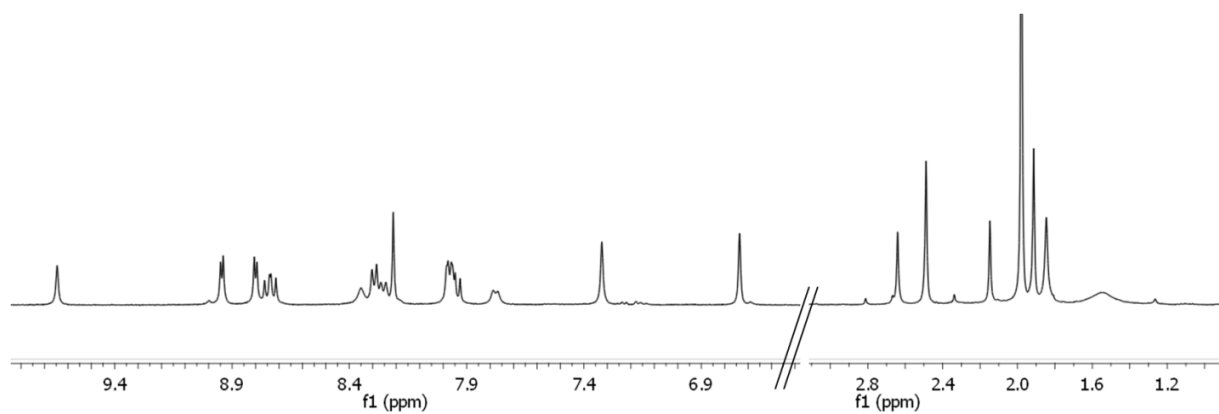

**Figure S6.**  $^1\text{H}$  NMR of **G** ( $\text{CD}_2\text{Cl}_2$ , 400 MHz, 298 K).

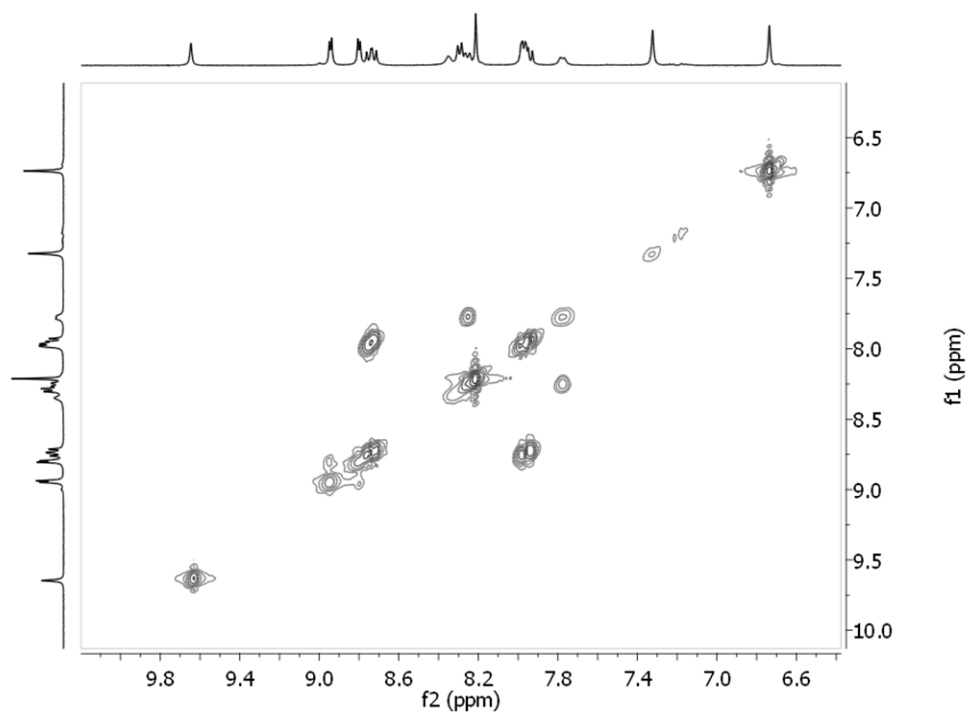

**Figure S7.**  $^1\text{H}$ - $^1\text{H}$  COSY of **G** ( $\text{CD}_2\text{Cl}_2$ , 400 MHz, 298 K).

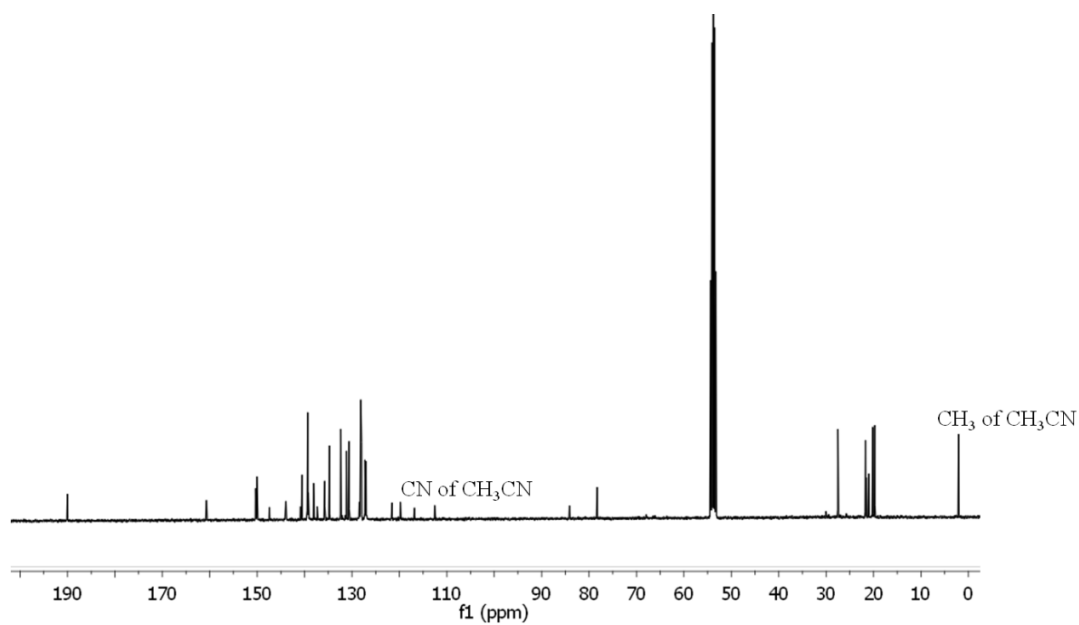

**Figure S8.**  $^{13}\text{C}$  NMR of **G** ( $\text{CD}_2\text{Cl}_2$ , 100 MHz, 298 K).

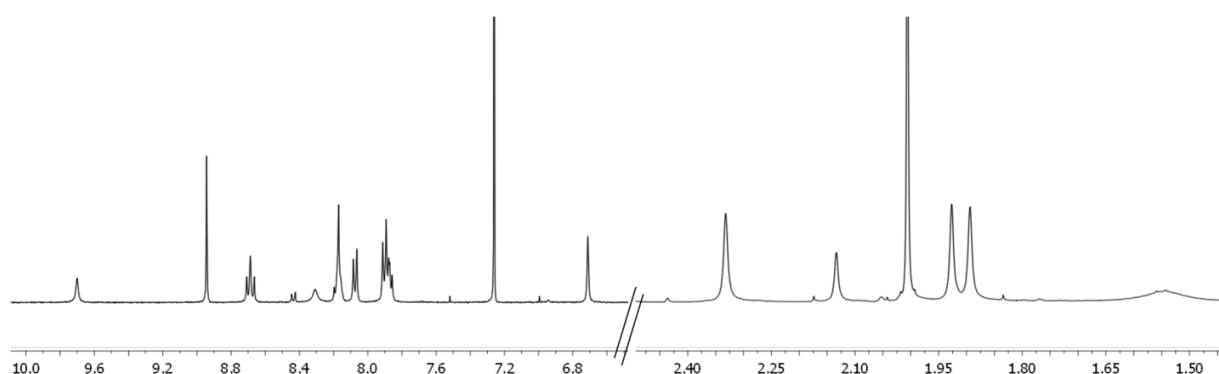

**Figure S9.**  $^1\text{H}$  NMR of **P** ( $\text{CDCl}_3$ , 400 MHz, 298 K).

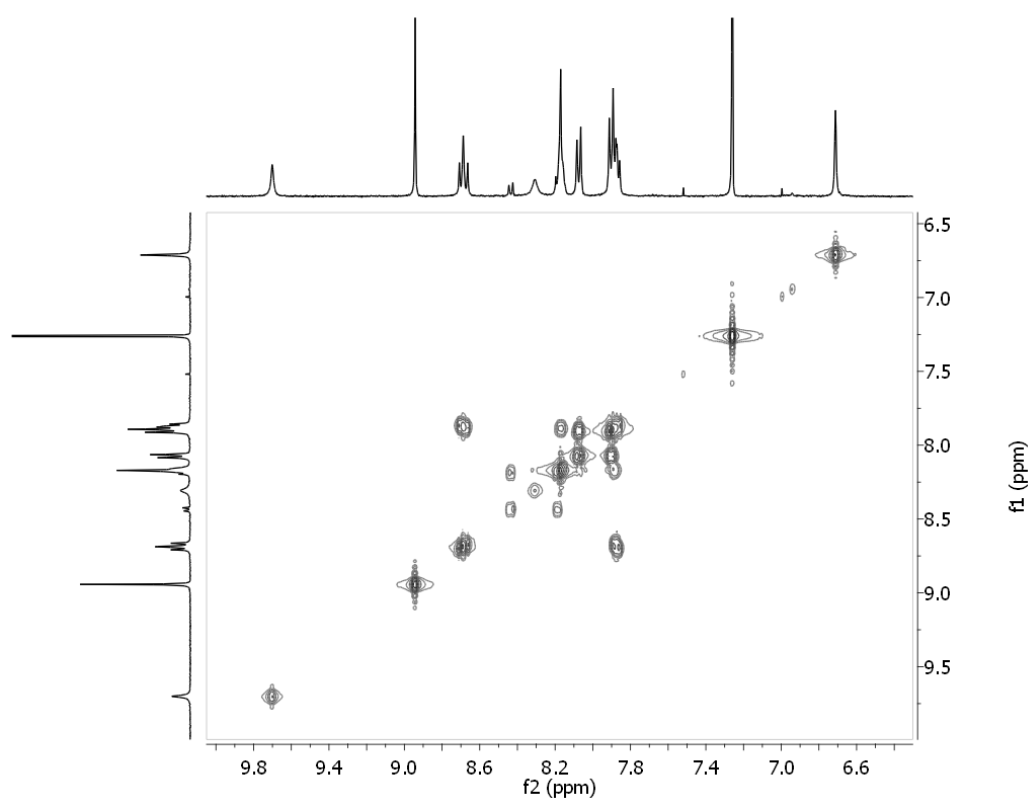

**Figure S10.**  $^1\text{H}$ - $^1\text{H}$  COSY of **P** ( $\text{CDCl}_3$ , 400 MHz, 298 K).

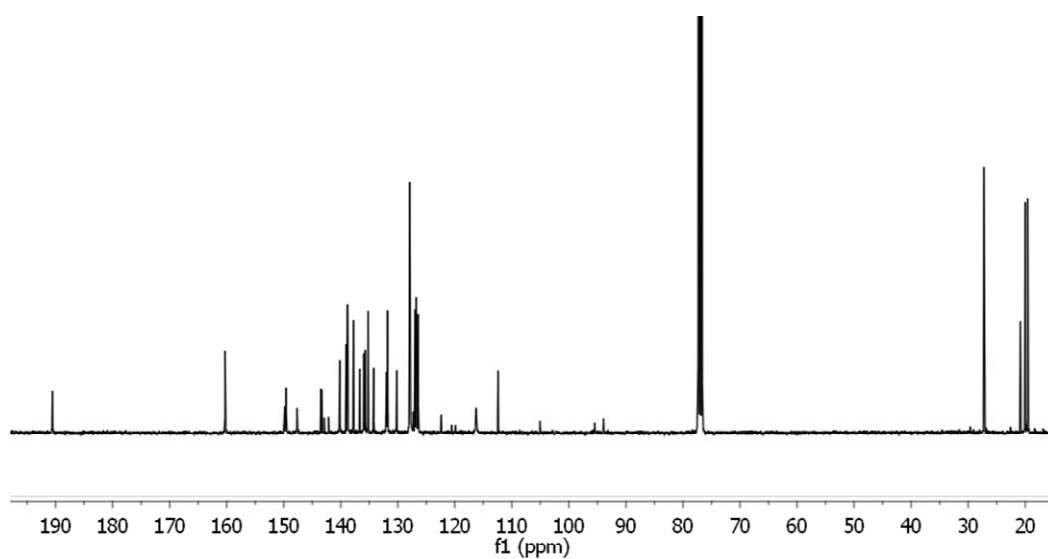

**Figure S11.**  $^{13}\text{C}$  NMR of **P** ( $\text{CDCl}_3$ , 100 MHz, 298 K).

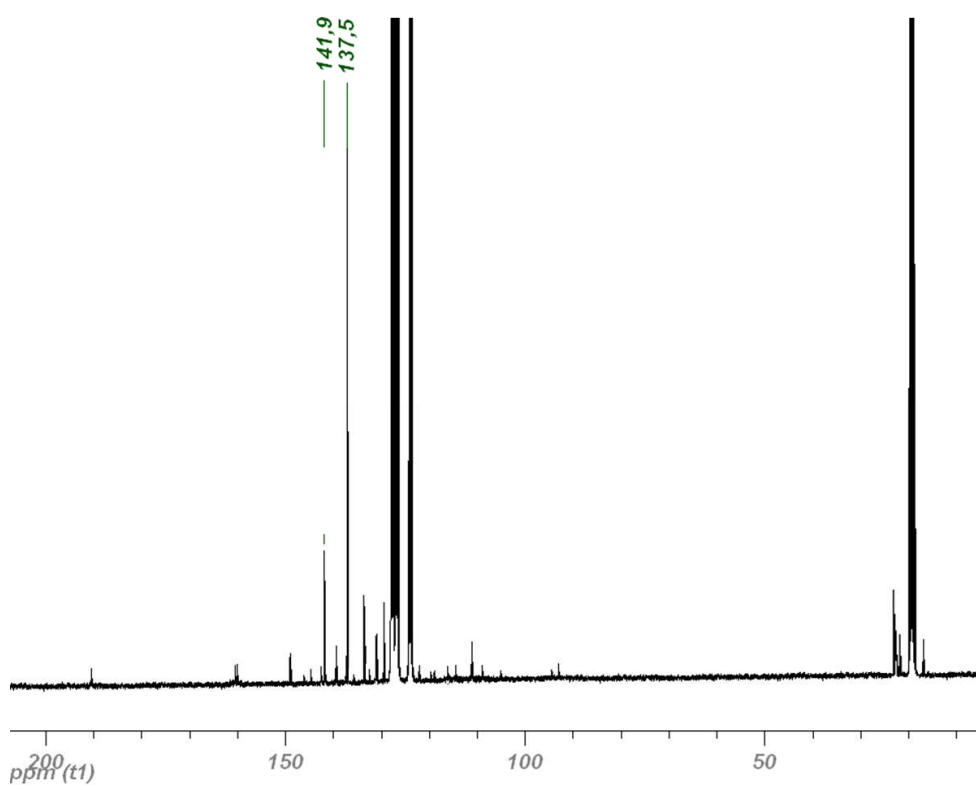

**Figure S12.**  $^{13}\text{C}$  NMR of  $\text{C}_{60}@\text{T}$  (toluene- $\text{d}_8$ , 100 MHz, 298 K).

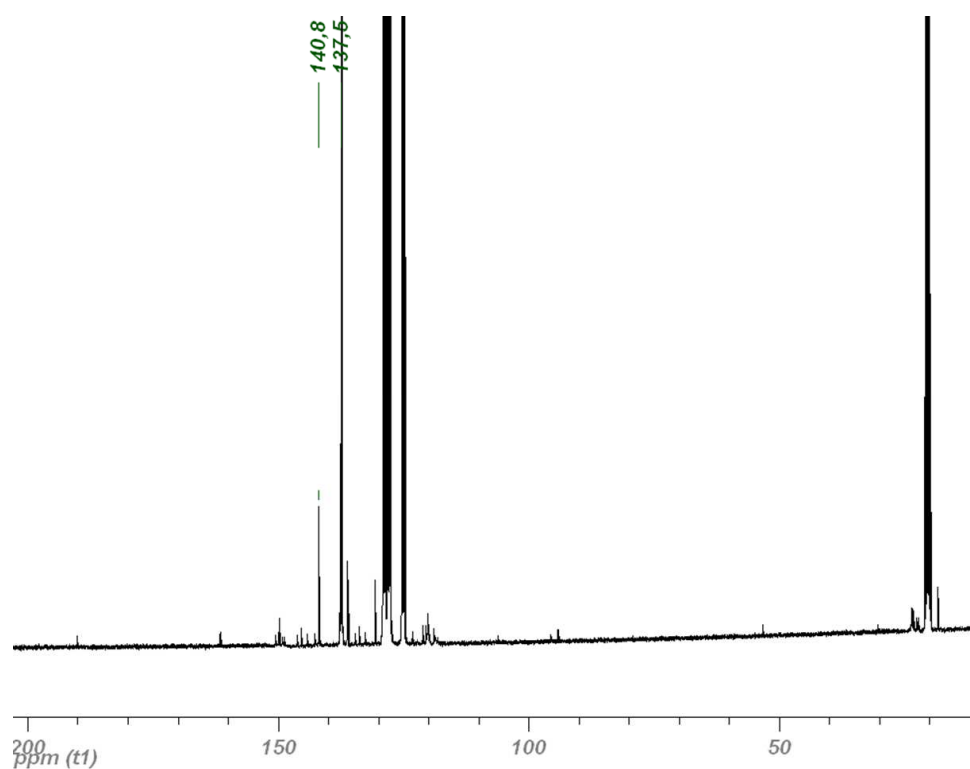

**Figure S13.**  $^{13}\text{C}$  NMR of  $\text{C}_{60}@G$  (toluene- $\text{d}_8$ , 100 MHz, 298 K).

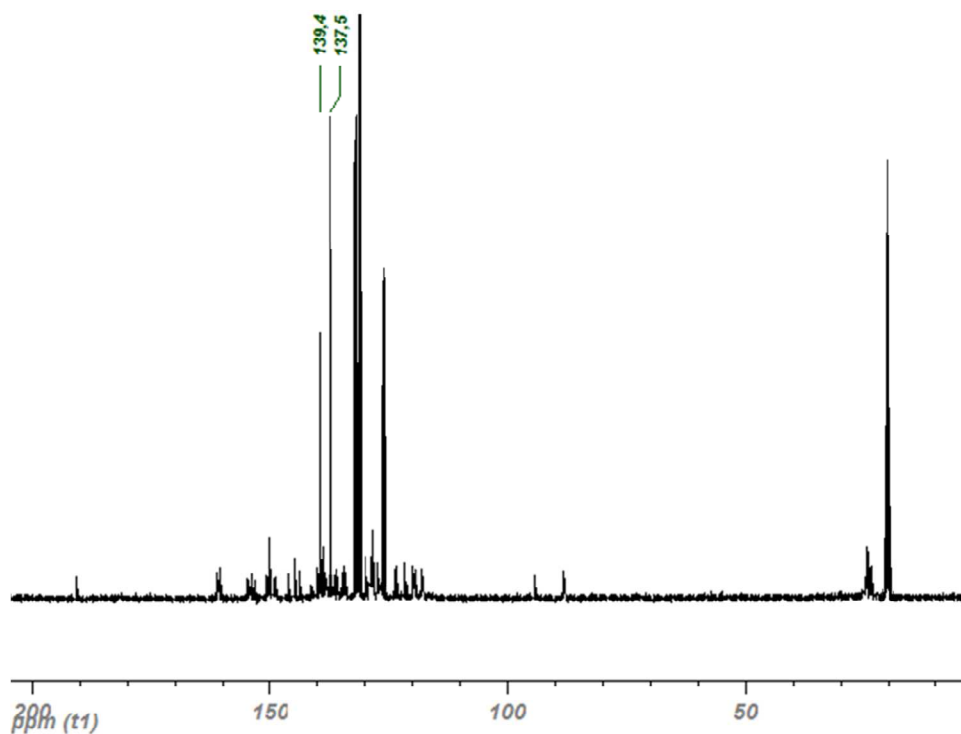

**Figure S14.**  $^{13}\text{C}$  NMR of  $\text{C}_{60}@P$  (toluene- $\text{d}_8$ , 100 MHz, 298 K)

## ESI-MS

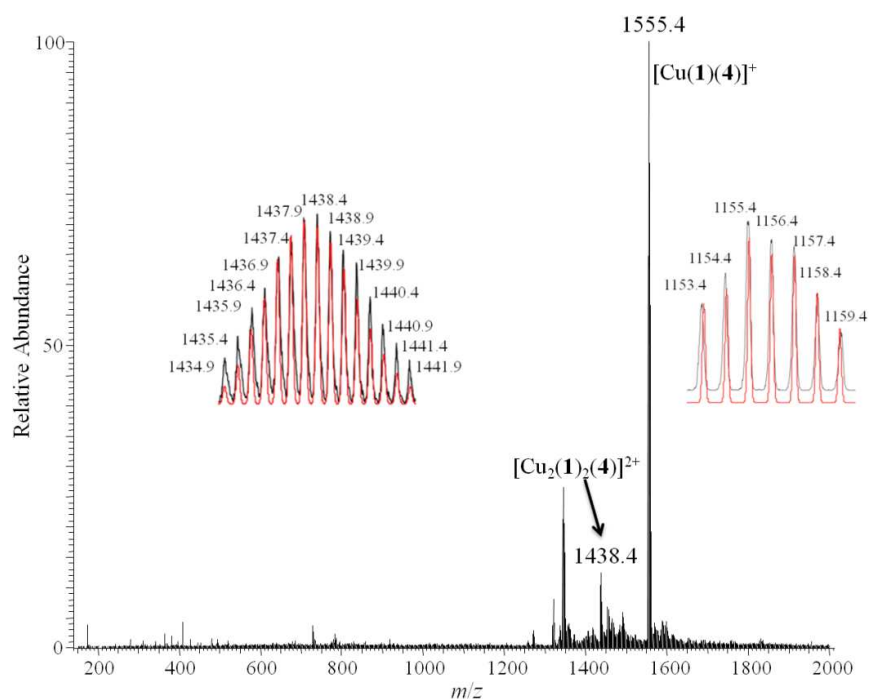

**Figure S15.** ESI-MS spectrum of **T**.

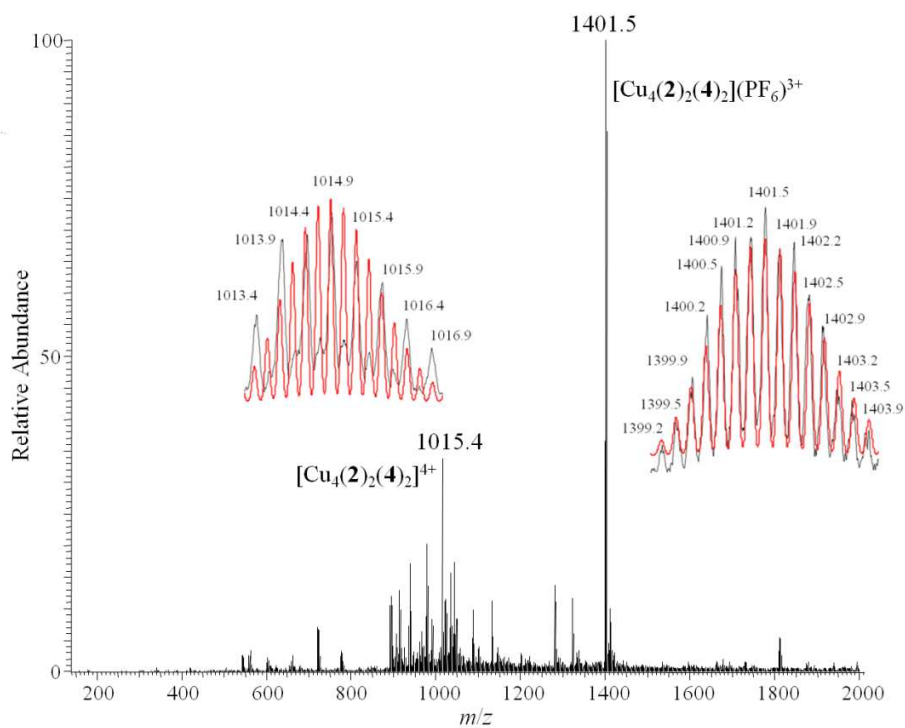

**Figure S16.** ESI-MS spectrum of **G**.

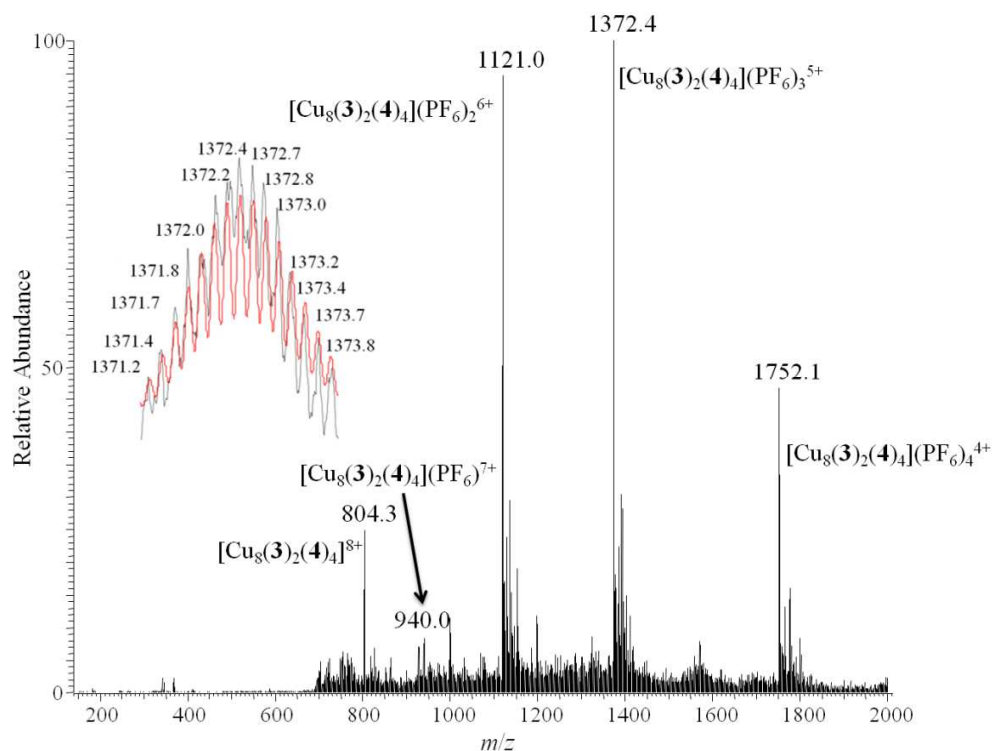

**Figure S17.** ESI-MS spectrum of **P**.

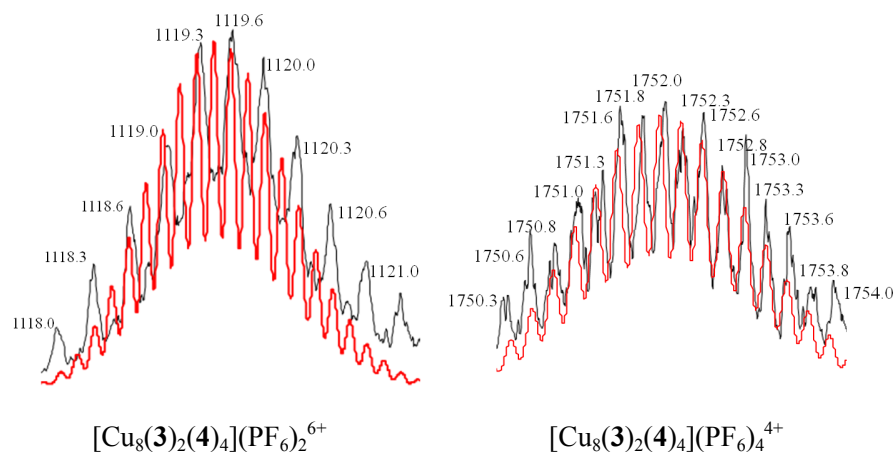

**Figure S18.** Experimental isotopic distributions (black lines) along with calculated isotopic distributions (red lines) for various charged species obtained after loss of the counter anions in the ESI-MS of **P**.

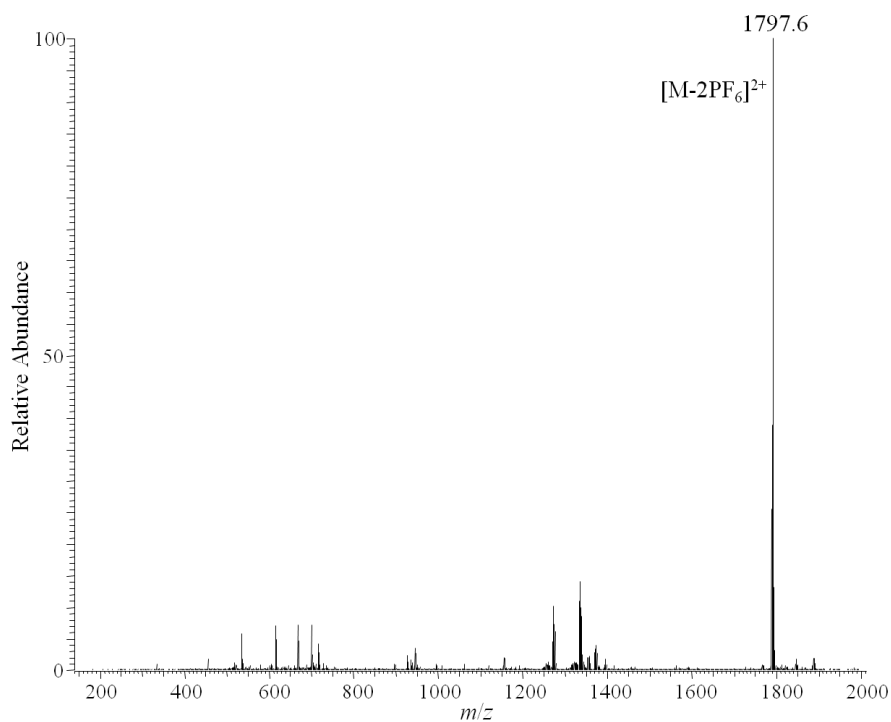

**Figure S19.** ESI-MS spectrum of  $C_{60}@T (= M)$  complex.

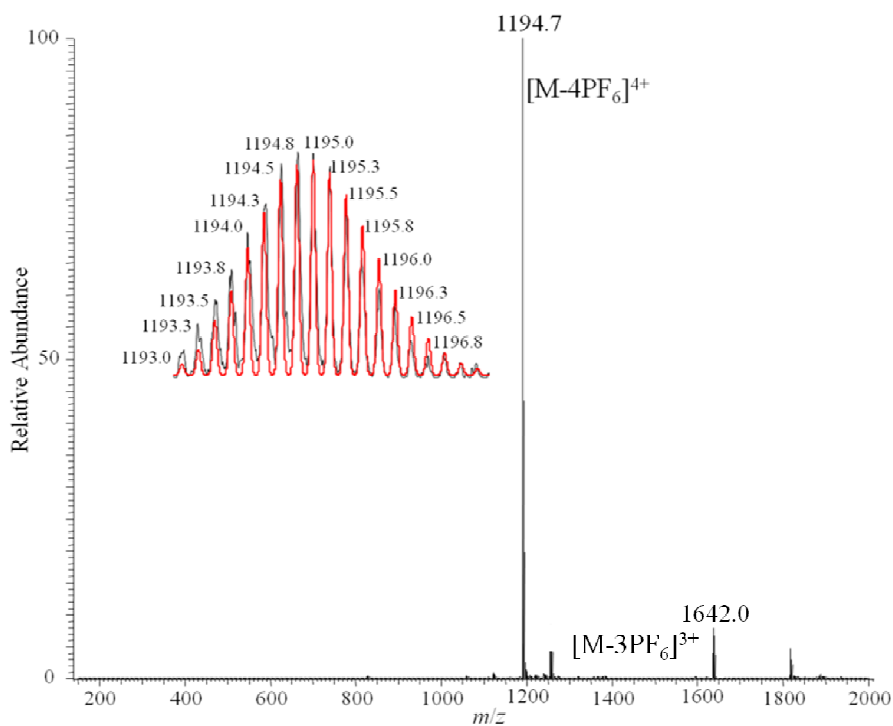

**Figure S20.** ESI-MS spectrum of  $C_{60}@G (= M)$  complex.

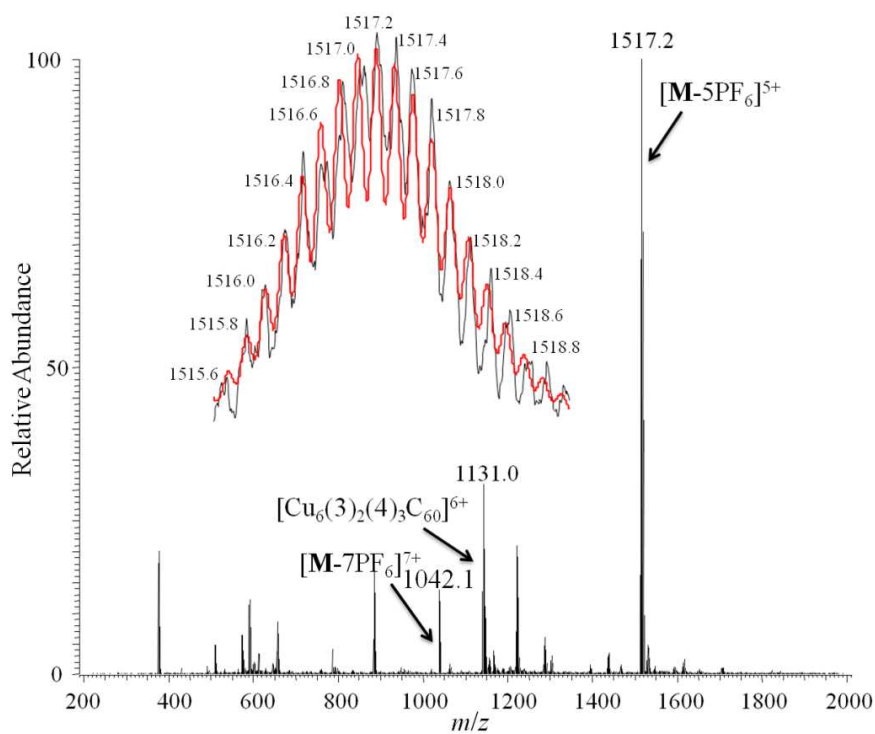

**Figure S21.** ESI-MS spectrum of  $C_{60}@P (= M)$  complex.

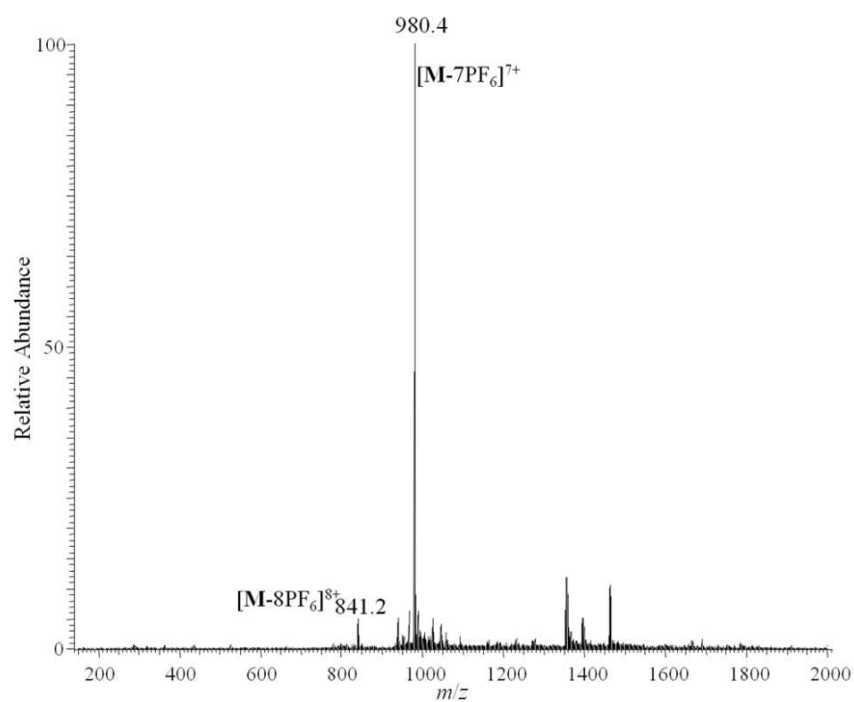

**Figure S22.** ESI-MS spectrum of coronene@P (= M) complex.

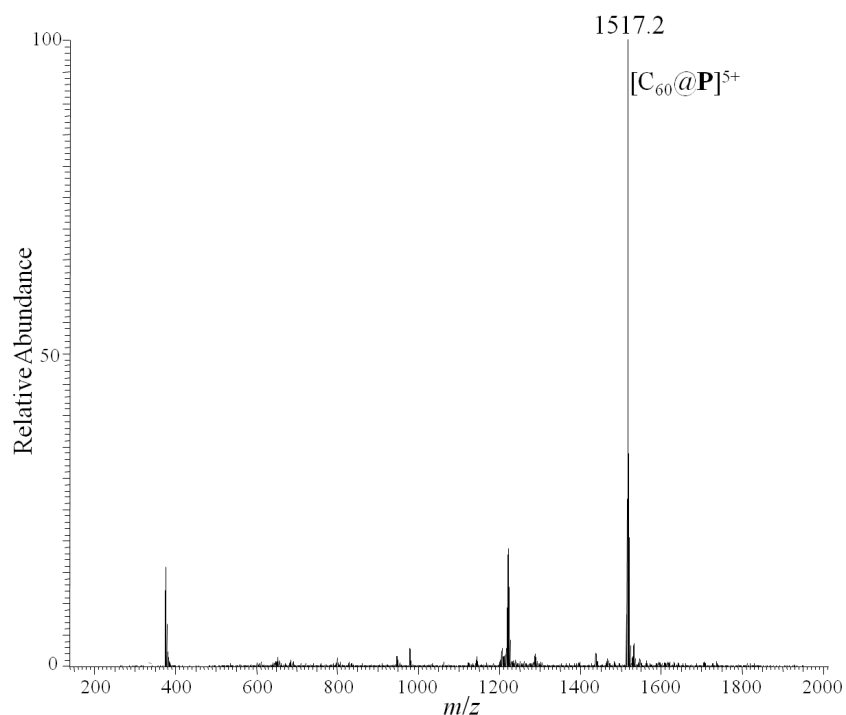

**Figure S23.** ESI-MS spectrum of mixture of coronene@P with C<sub>60</sub> after refluxing for 2h.

## Absorption Spectral Data

$K_{\text{assoc}}$  values were evaluated by applying nonlinear curve-fitting to absorbance changes ( $\Delta Abs$ ) observed for the host upon titration with C<sub>60</sub> or coronene:

$$\Delta Abs = (L(1 + K_{\text{assoc}}X + K_{\text{assoc}}A) - (L^2(K_{\text{assoc}}X + K_{\text{assoc}}A + 1)^2 - 4K_{\text{assoc}}^2AXL^2)^{0.5})/2K_{\text{assoc}}A$$

where X and A represent  $[\text{Guest}]_{\text{total}}$  and  $[\text{Host}]_{\text{total}}$ , respectively; L denotes  $\Delta Abs$  at 100% complexation; L and  $K_{\text{assoc}}$  are parameters.

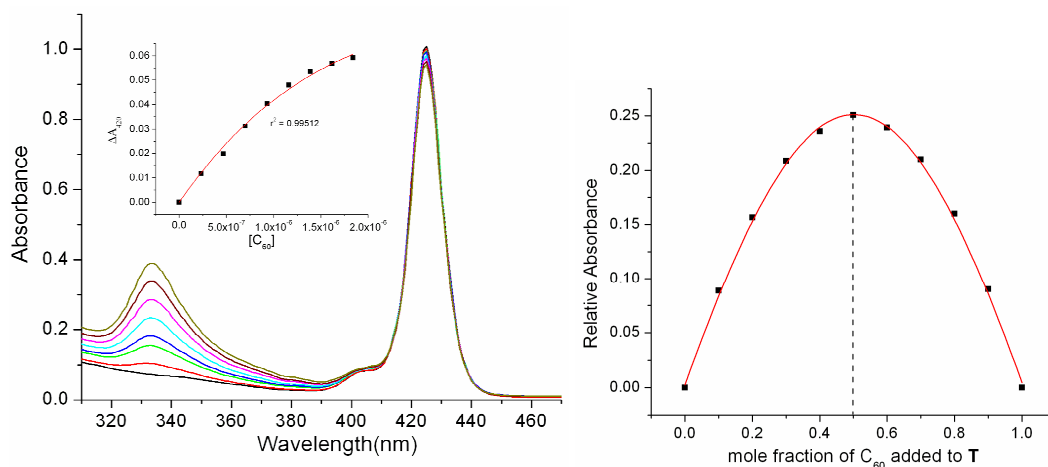

**Figure S24.** (Left) Absorption changes of **T** in toluene at 298 K upon titration with  $C_{60}$ . (Inset : nonlinear curve-fitting of UV-vis absorption data at  $\lambda = 420$  nm:  $K_{\text{assoc}} = (2.9 \pm 0.3) \times 10^4 \text{ M}^{-1}$ ). (Right) Job plot analysis using UV-vis absorption data for  $C_{60}@T$  complex at  $\lambda = 420$  nm.

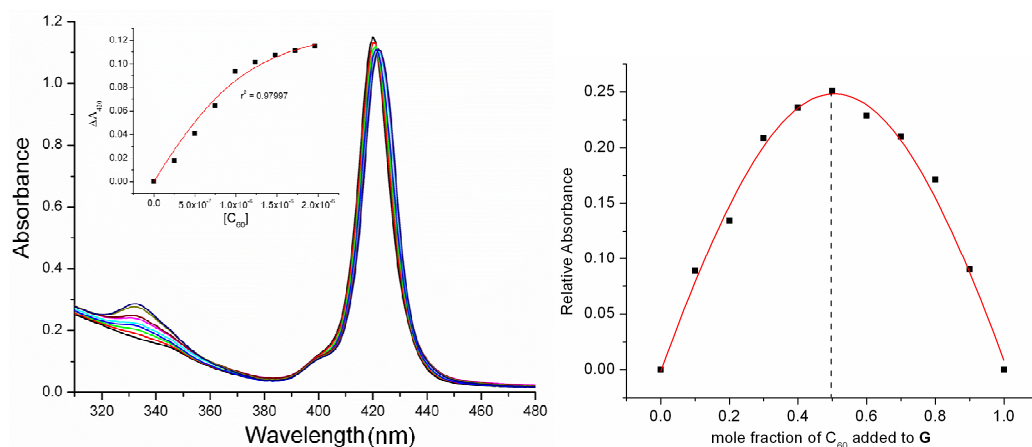

**Figure S25.** (Left) Absorption changes of **G** in toluene at 298 K upon titration with  $C_{60}$ . Inset: Nonlinear curve fitting of the UV-vis absorption data at  $\lambda = 420$  nm:  $K_{\text{assoc}} = (9.1 \pm 0.4) \times 10^4 \text{ M}^{-1}$ . (Right) Job plot analysis using UV-vis absorption data for  $C_{60}@G$  complex at  $\lambda = 420$  nm.

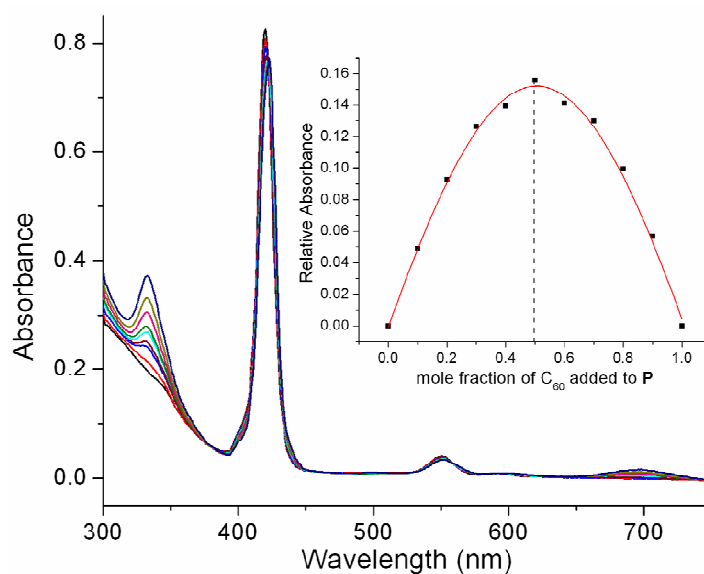

**Figure S26.** Absorption changes of **P** in toluene at 298 K upon titration with  $C_{60}$ :  $K_{\text{assoc}} = (3.3 \pm 0.3) \times 10^6 \text{ M}^{-1}$ . Inset: Job plot analysis using UV-vis absorption data for  $C_{60}@P$  complex at  $\lambda = 420 \text{ nm}$ .

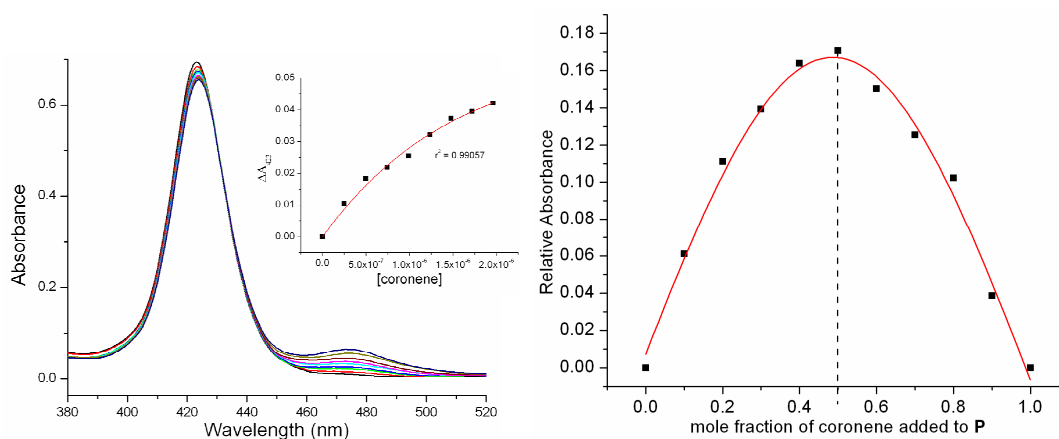

**Figure S27.** (Left) Absorption changes of **P** in  $\text{CH}_2\text{Cl}_2$  at 298 K upon titration with coronene. Inset: Nonlinear curve fitting of the UV-vis absorption data at  $\lambda = 420 \text{ nm}$ :  $K_{\text{assoc}} = (1.1 \pm 0.6) \times 10^4 \text{ M}^{-1}$ . (Right) Job plot analysis using UV-vis absorption data for coronene@**P** complex at  $\lambda = 420 \text{ nm}$ .

## Energy Minimised Structures

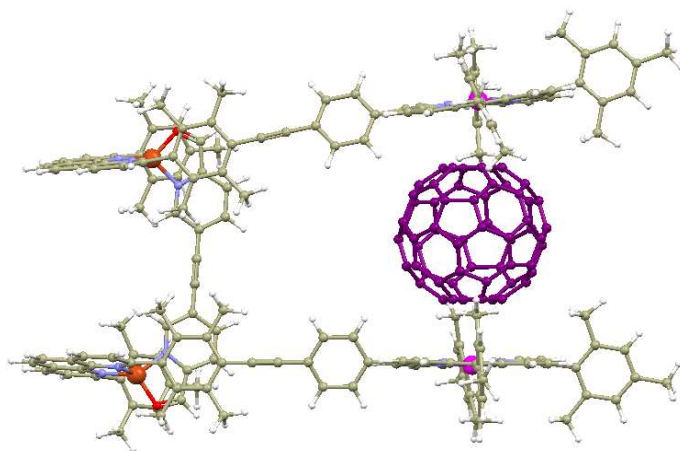

**Figure S28.** MM+ computed structure of  $C_{60}@T$ .

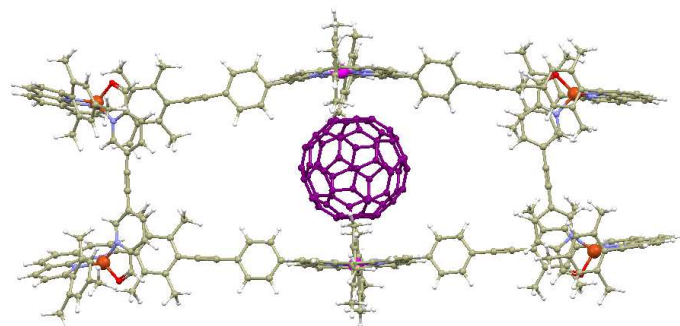

**Figure S29.** MM+ computed structure of  $C_{60}@G$ .

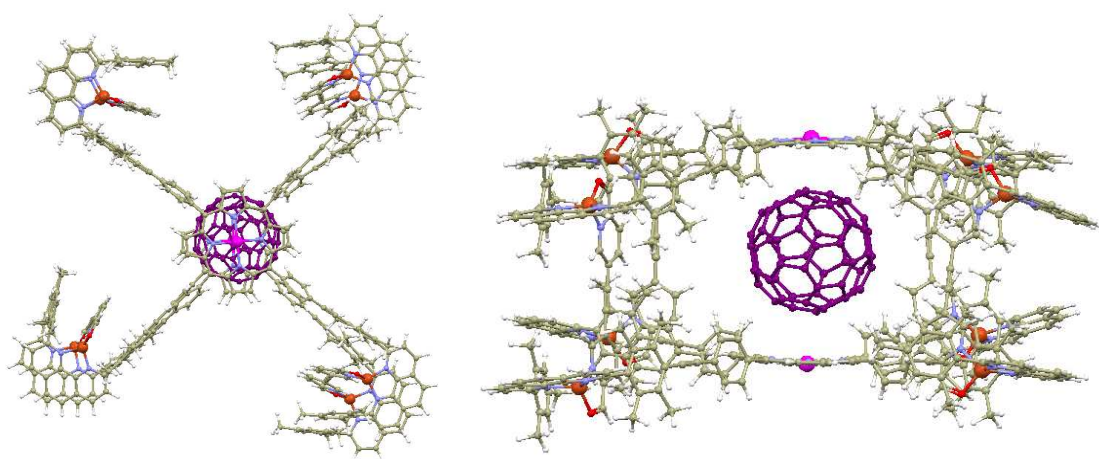

**Figure S30.** MM+ computed structure of  $C_{60}@P$ . (left) topview and (right) sideview.

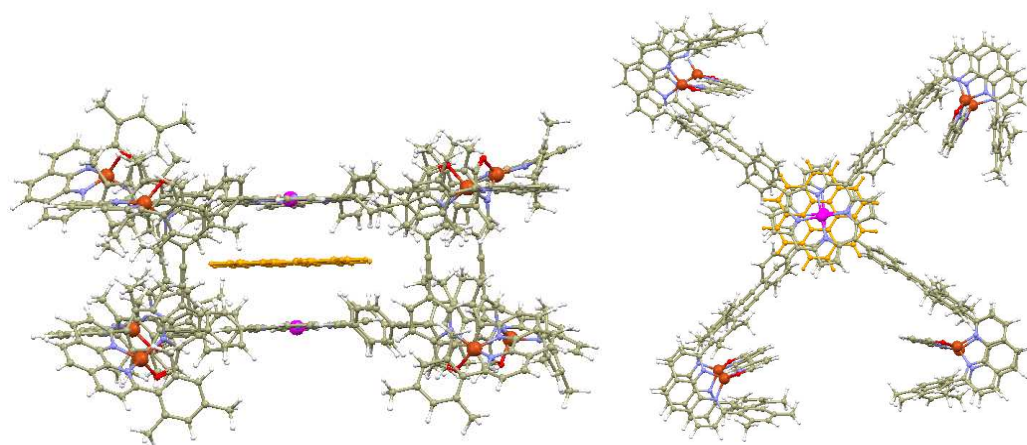

**Figure S31.** MM+ computed structure of coronene@P, (left) sideview and (right) topview.

## DOSY NMR

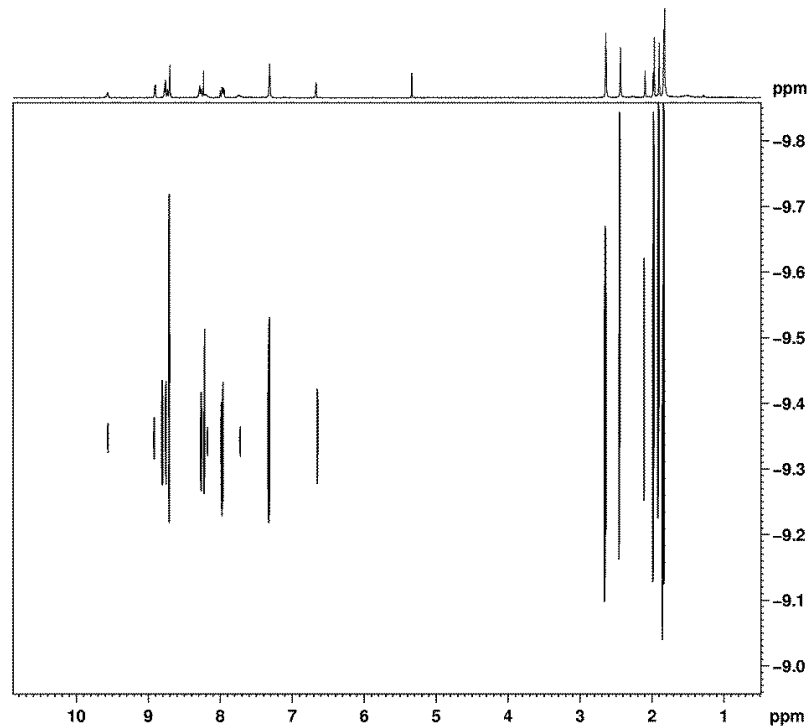

**Figure S32.**  $^1\text{H}$  DOSY of T in  $\text{CD}_2\text{Cl}_2$ .

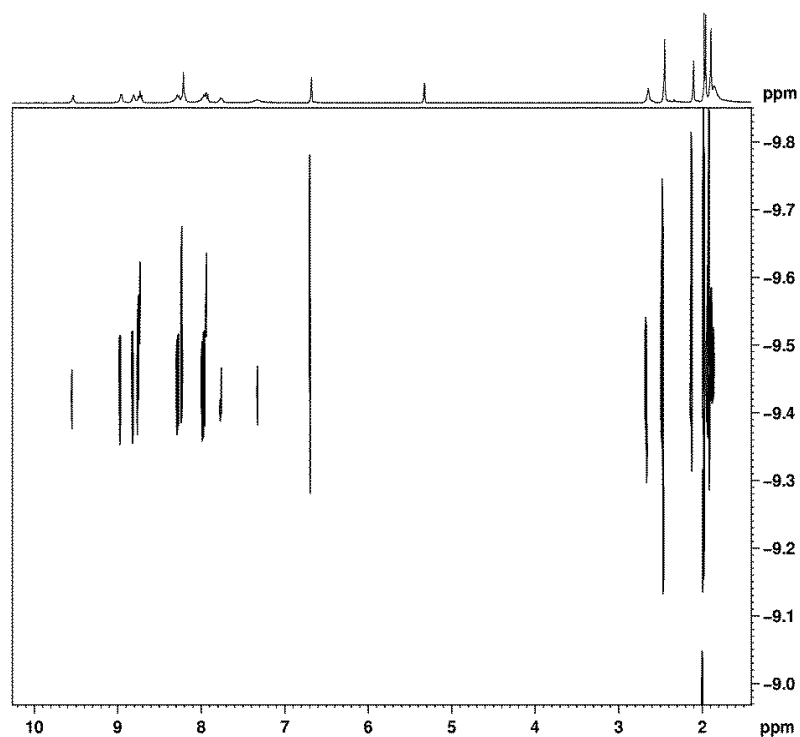

**Figure S33.** <sup>1</sup>H DOSY of **G** in CD<sub>2</sub>Cl<sub>2</sub>.

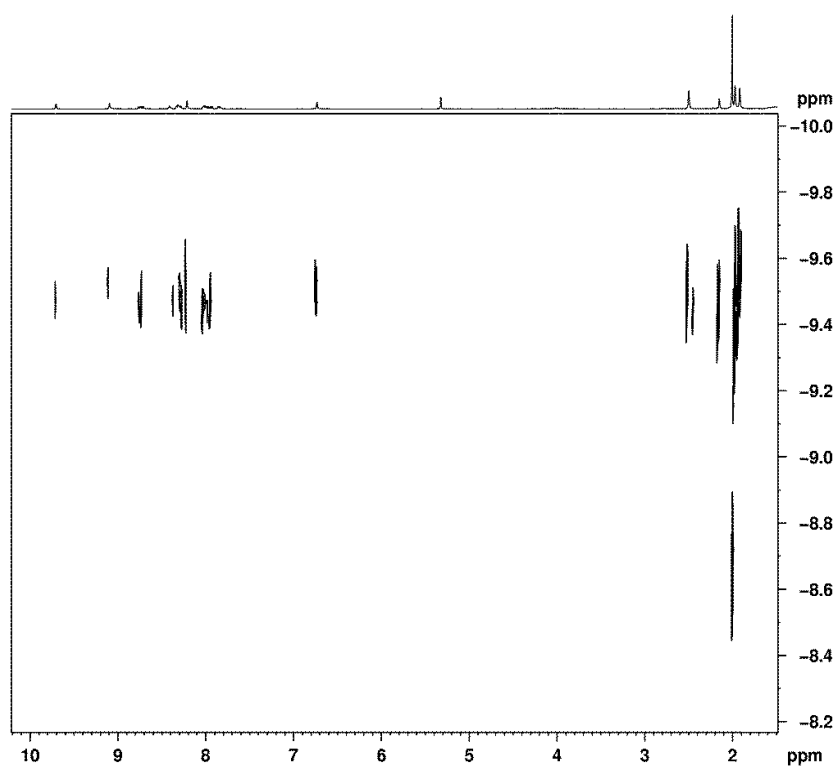

**Figure S34.** <sup>1</sup>H DOSY of **P** in CD<sub>2</sub>Cl<sub>2</sub>.
